# Supplementary material
Source: PubMed Central journal article supplement (PMC3321112)

## Supplemental Section

### Supplemental Figure Legends

**Sup Fig. 1.** Pronase digestion followed by Biogel P6 size exclusion chromatography of glycopeptide fragments arising from [ $^3\text{H}$ ] sialylated cellular glycoproteins from human cancer cell lines A: MCF-7; B: LNCaP; C: SKOV3; D: HL60; E: HepG2. Void volume in this column occurs at 30mL. Data for T47D and LS180 obtained using the identical protocol is provided in Fig. 2A (main manuscript).

**Sup Fig. 2.** A comparison of Biogel P6 fractions resulting from mild alkaline borohydride treatment of [ $^3\text{H}$ ] sialylated cellular glycoproteins from human cancer cell lines A: LNCaP; B: SKOV3; C: HL60; D: HepG2. Similar data for T47D, MCF-7 and LS180 is provided in Fig. 3A (main manuscript).

**Sup Fig. 3.** SDS-PAGE of [ $^{14}\text{C}$ ] sialyl mucin glycoproteins present in human tumor specimens: An aliquot (20 $\mu\text{L}$ ) of [ $^{14}\text{C}$ ] sialyl dialyzed tumor extract preparation in SDS-buffer was denatured by boiling for 5 min and then subjected to SDS-PAGE in 4-20% polyacrylamide gradient gels. Following transfer to nitrocellulose membrane, radioactive glycoprotein bands were visualized by phosphorimaging. Lanes 1 to 3: Pancreas; Lane 4: Breast; Lane 5: Colon; Lanes 6, 7: Ovary; Lanes 8 to 10: Prostate.

**Sup Fig 4.** Characterization of [ $^{14}\text{C}$ ] sialyl mucin glycoproteins present in human sera:

**Panels A-D:** Biogel P6 column chromatography after exhaustive pronase digestion of [ $^{14}\text{C}$ ] sialyl serum mucin glycoprotein preparation (700 $\mu\text{L}$ ): A: normal; B: ovarian cancer; C: pancreatic cancer and D: [ $^{14}\text{C}$ ]sialyl fetuin.

**Panels E-H:** Biogel P6 column chromatography after mild alkaline borohydride treatment of [ $^{14}\text{C}$ ] sialyl serum mucin glycoprotein preparation (500 $\mu\text{L}$ ): E: normal; F: ovarian cancer; G: pancreatic cancer and H: [ $^{14}\text{C}$ ]sialyl fetuin

Sup Fig 1

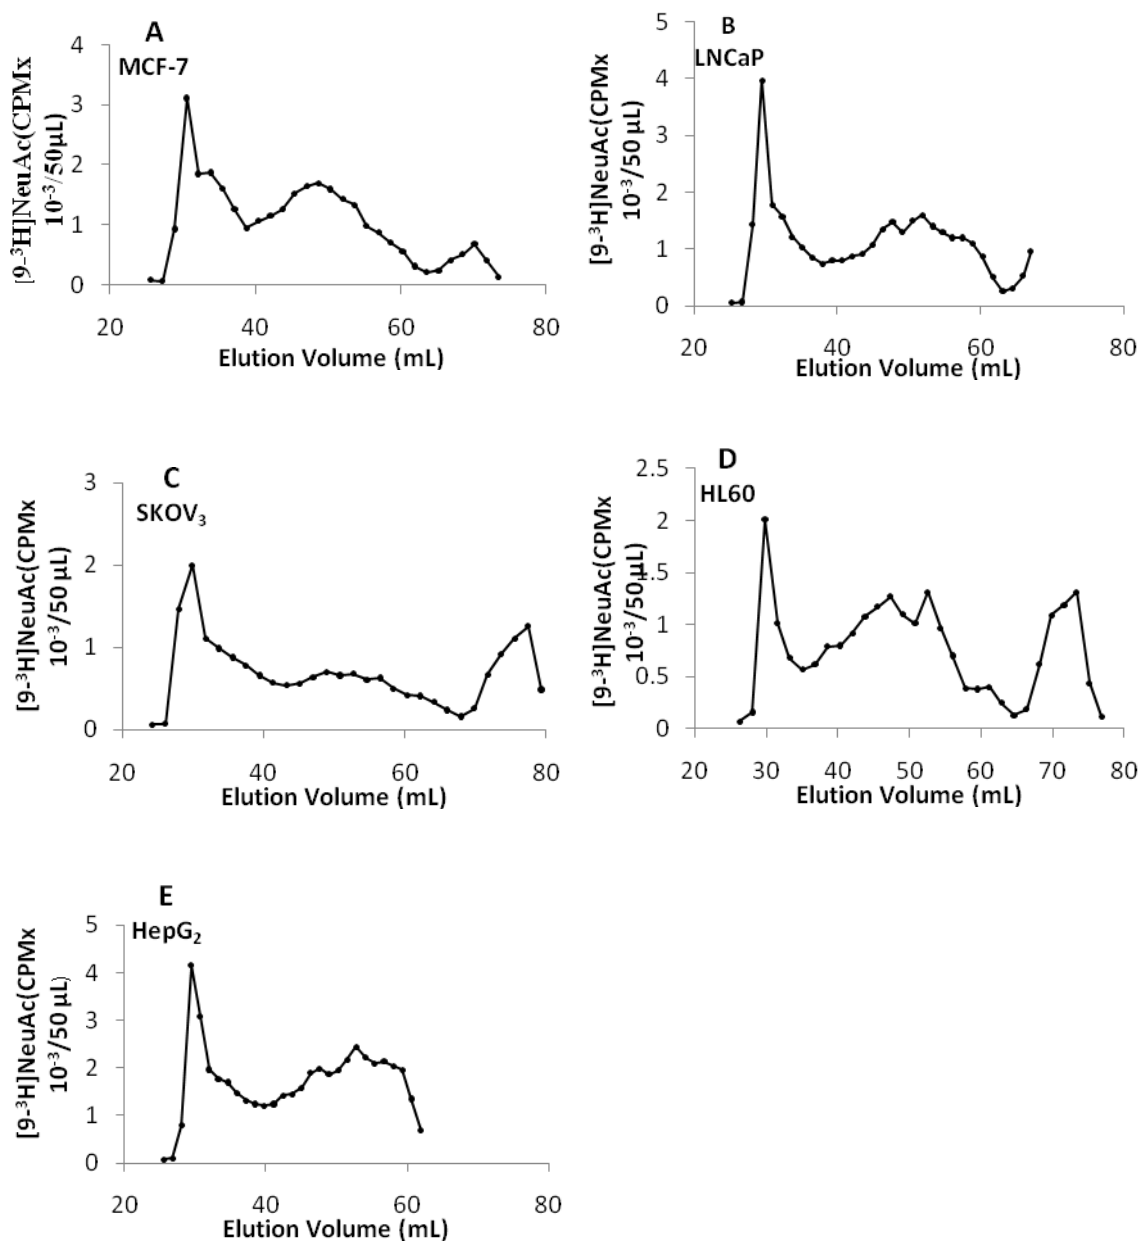

Sup Fig 2

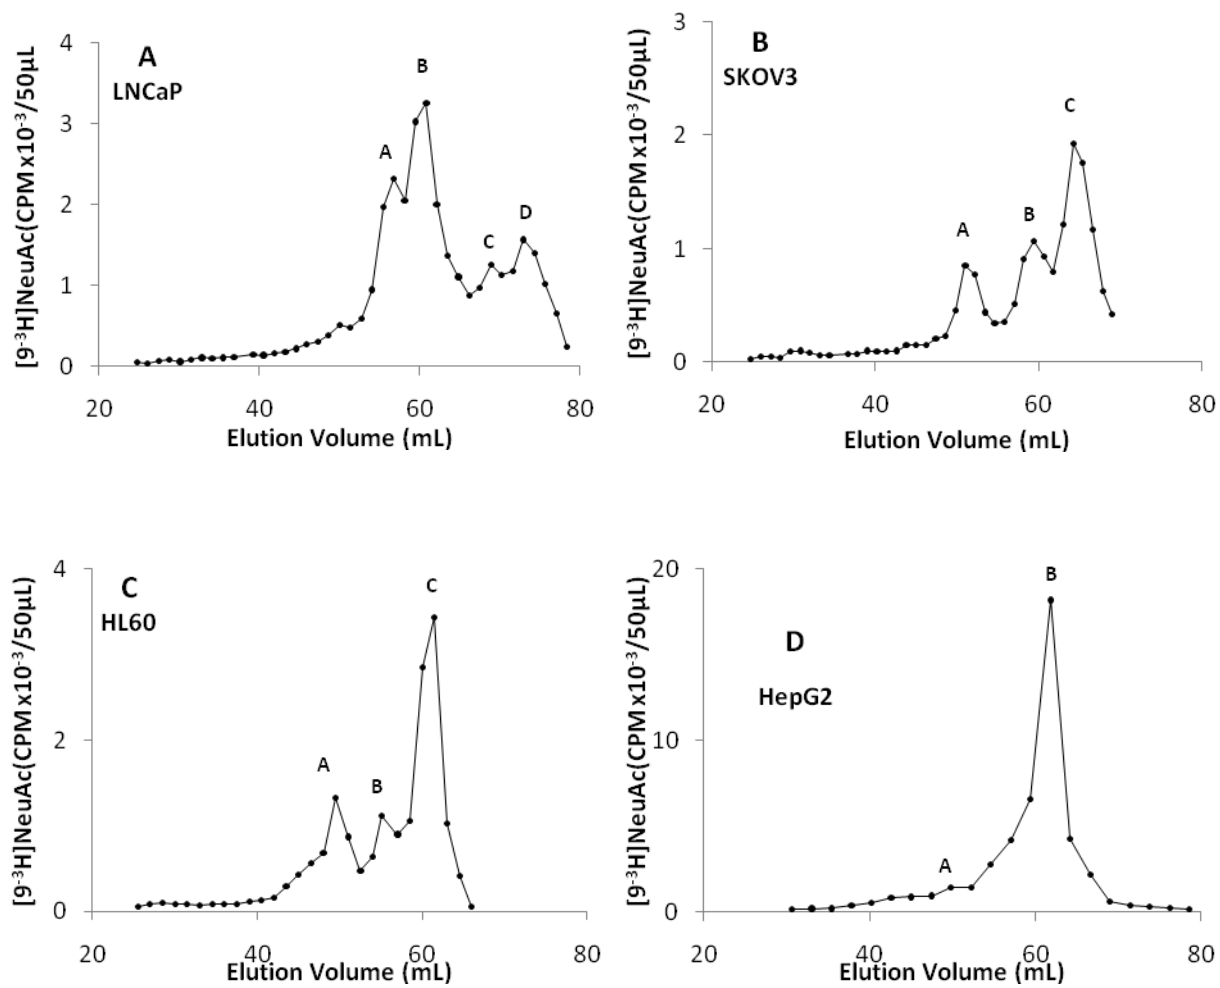



Sup Fig 4

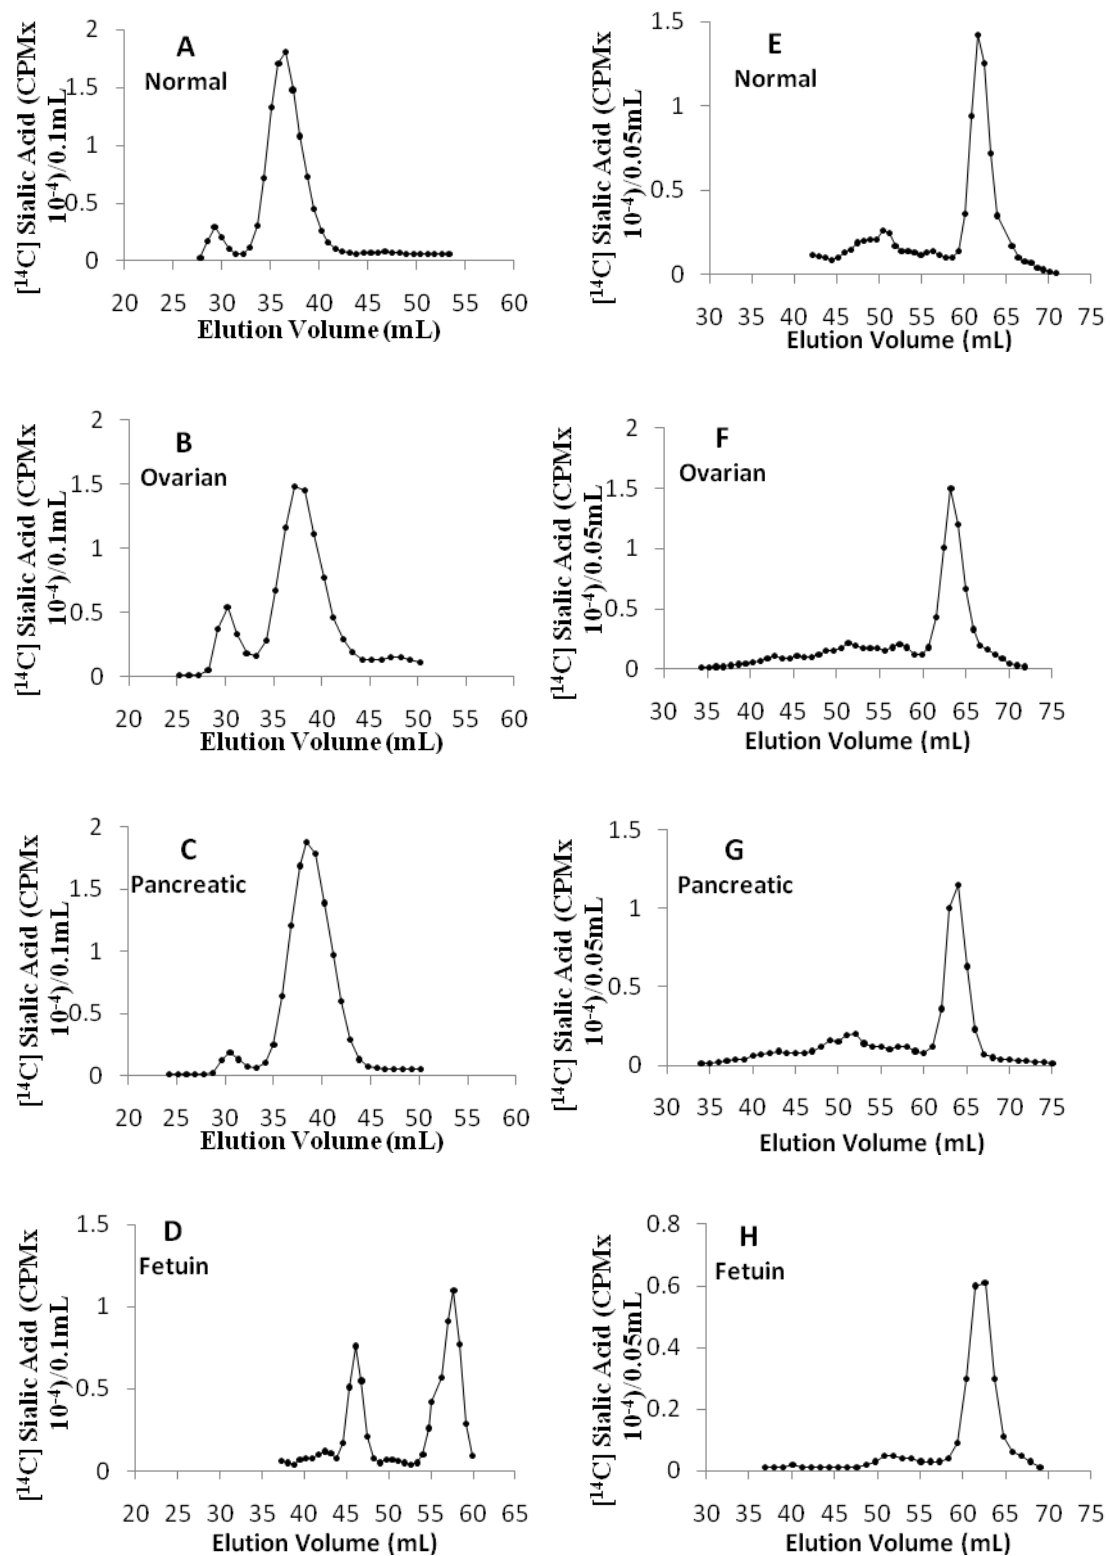

Supplement: NIHMS360341-supplement-1_si_001.pdf [file NIHMS360341-supplement-1_si_001.pdf]
